# Supplementary figures and images for: Arginine methylation of SmB is required for Drosophila germ cell development
Source: Oxford University Press journal article supplement (doi:10.1242/dev.052944), 2010-07-22

stage 9

GFP-SmB

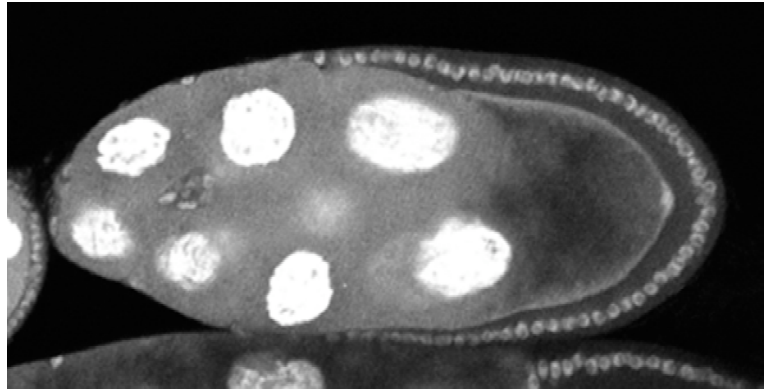

Supplement: dev052944figs1.pdf [file dev052944figs1.pdf]

**UAS-osk-M139L**

**GFP-SmB**

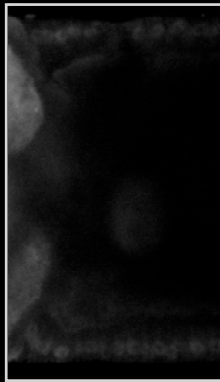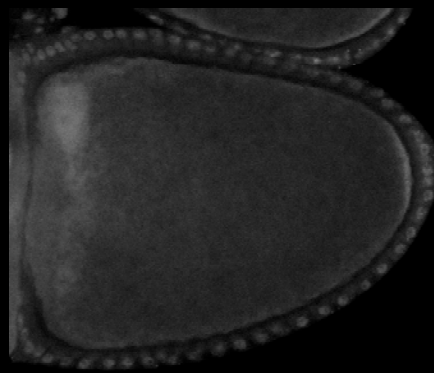

**Osk**

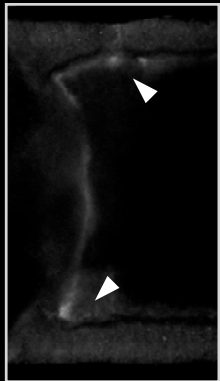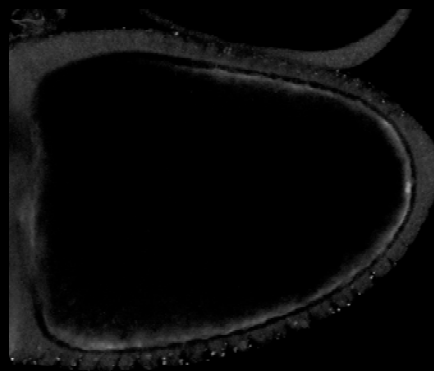

**GFP-SmB**

**Osk**

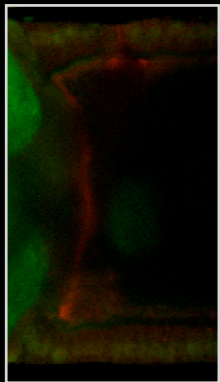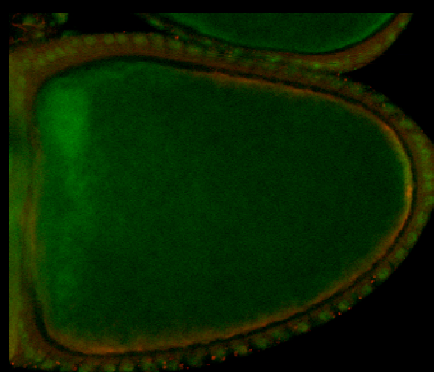

Supplement: dev052944figs2.pdf [file dev052944figs2.pdf]

Vas DNA

A

SmB-R1-7K

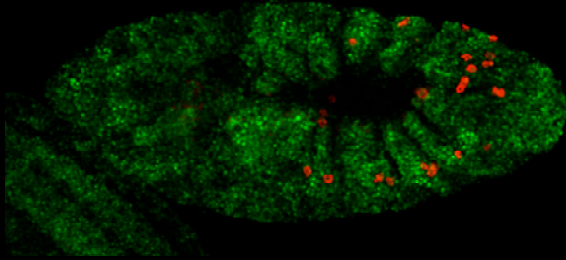

B

SmB-R1-3K

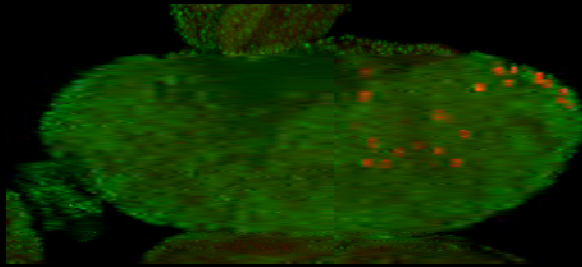

Supplement: dev052944figs3.pdf [file dev052944figs3.pdf]
